# Supplementary material
Source: MDPI journal article supplement (https://www.mdpi.com/2076-3263/10/8/292)

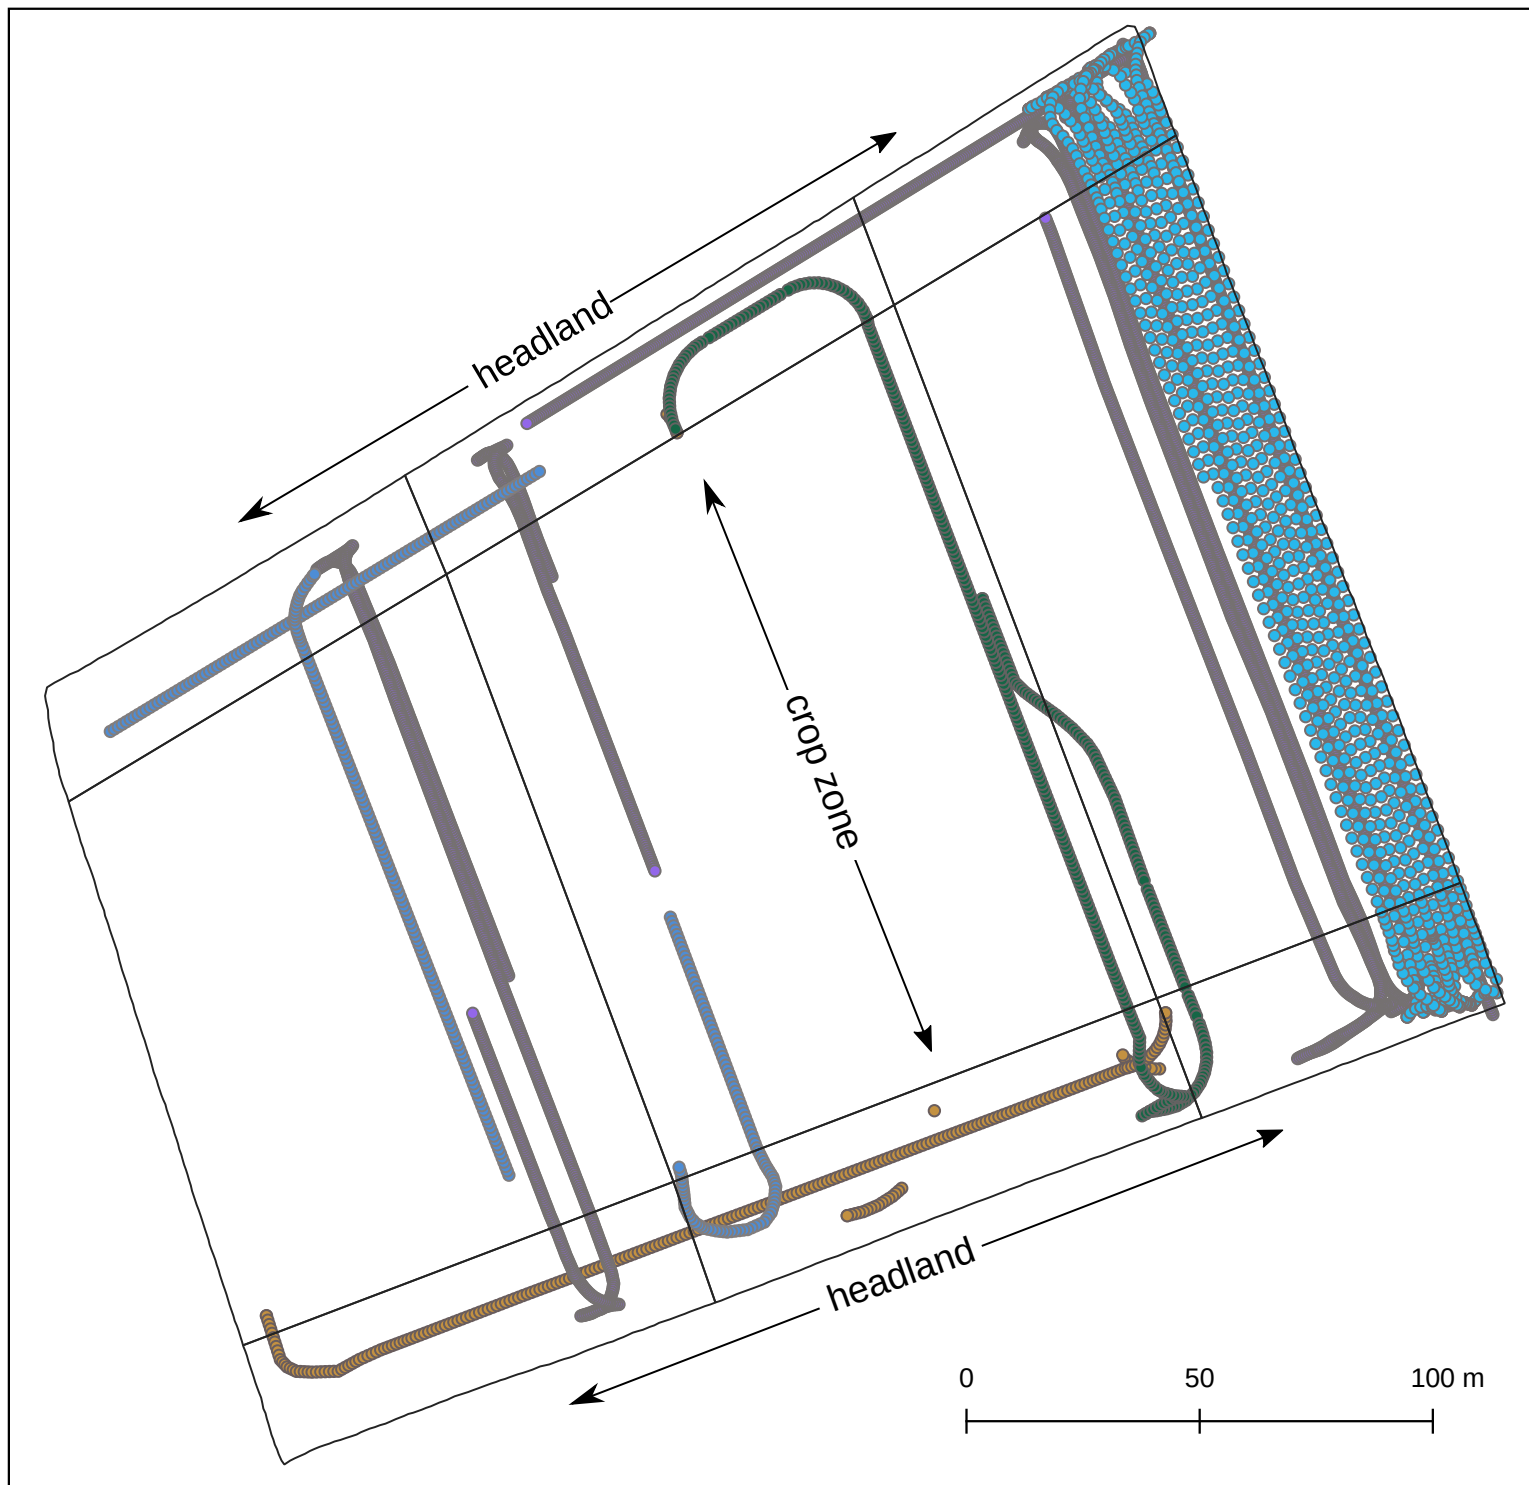

### Study Area and Data Gaps - from 2014 to 2018

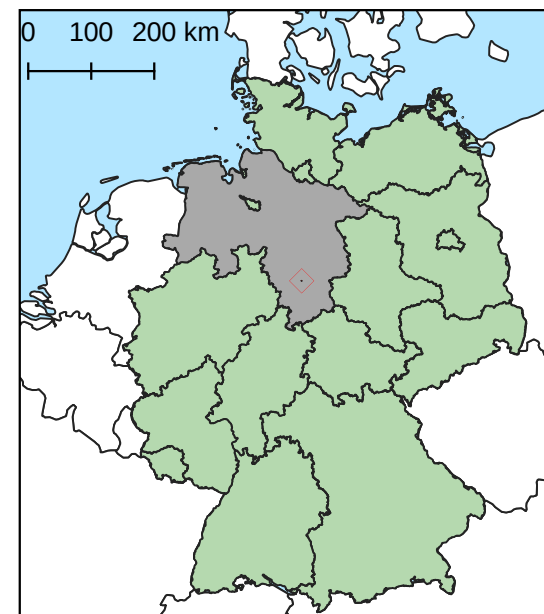

- 2017-2018 mulching
- 2016-2017 plow
- 2015-2016 chopper
- 2016-2017 harvester
- 2015-2016 chopper

ETRS 1989 UTM Zone 32N

Supplement: s1 [file s1]
